# Supplementary material
Source: Copernicus journal article supplement (doi:10.5194/wes-11-1321-2026)
Supplement: Supplementary file 1 [file wes-11-1321-2026-supplement.pdf]

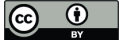

*Supplement of*

## **Fully coupled, high-resolution atmosphere–ocean–wave simulations of the offshore wind energy environment during Hurricane Henri (2021)**

**Chunyong Jung et al.**

*Correspondence to:* Chunyong Jung (cjung2@anl.gov) and Pengfei Xue (pexue@mtu.edu)

The copyright of individual parts of the supplement might differ from the article licence.

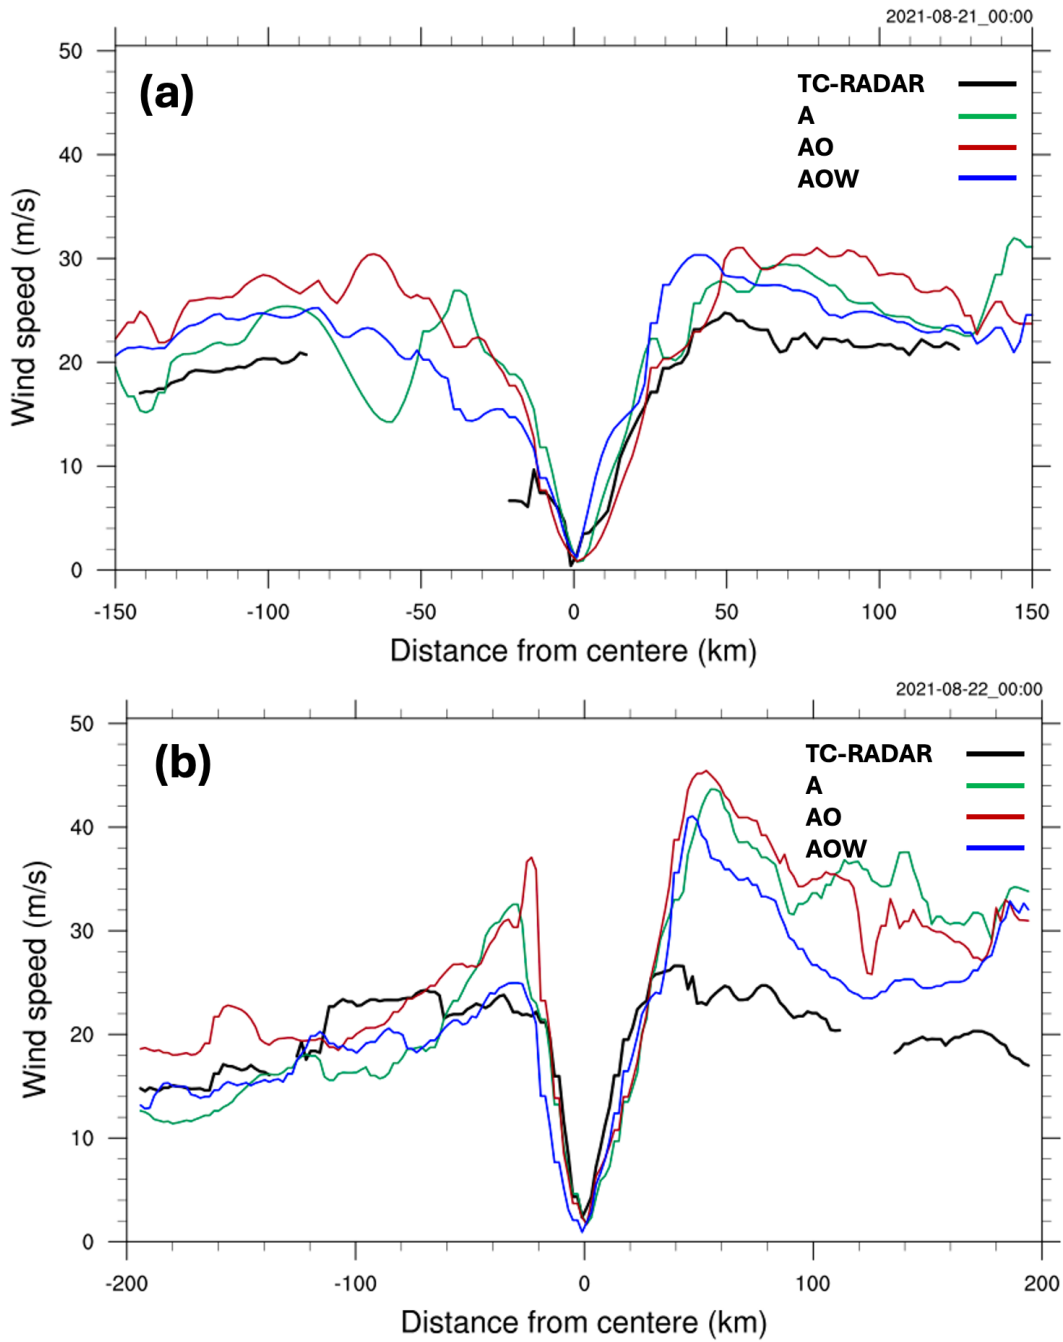

26

27

28 Figure S1. Radial profiles of wind speed from the airborne Doppler radar and the three model simulations  
 29 are shown in Figure 5 for (a) 00 UTC on 21 and (b) 22 August 2021. The profiles are presented at the 1-km  
 30 level along the line from A to B, as indicated in Figure 4.

31

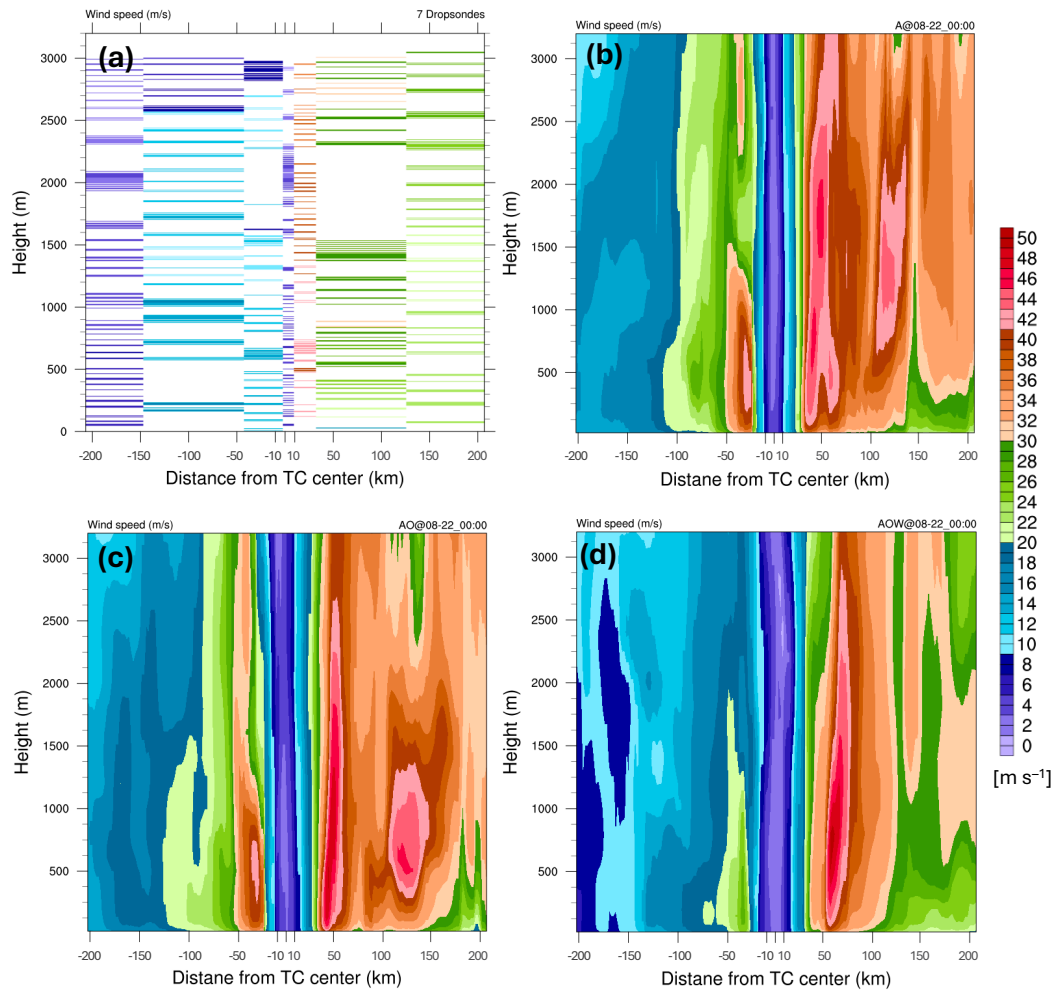

32

33 **Figure S2: Vertical cross-sections of (a) observed wind speed along the locations of the seven dropsondes,**  
 34 **shown as colored dots in Fig. 3(d). The times of the first and last dropsondes are 23:23 UTC on 21 August and**  
 35 **00:11 UTC on 22 August, respectively. Corresponding cross-sections from (b) experiment 'A', (c) experiment**  
 36 **'AO', and (d) experiment 'AOW' are shown.**

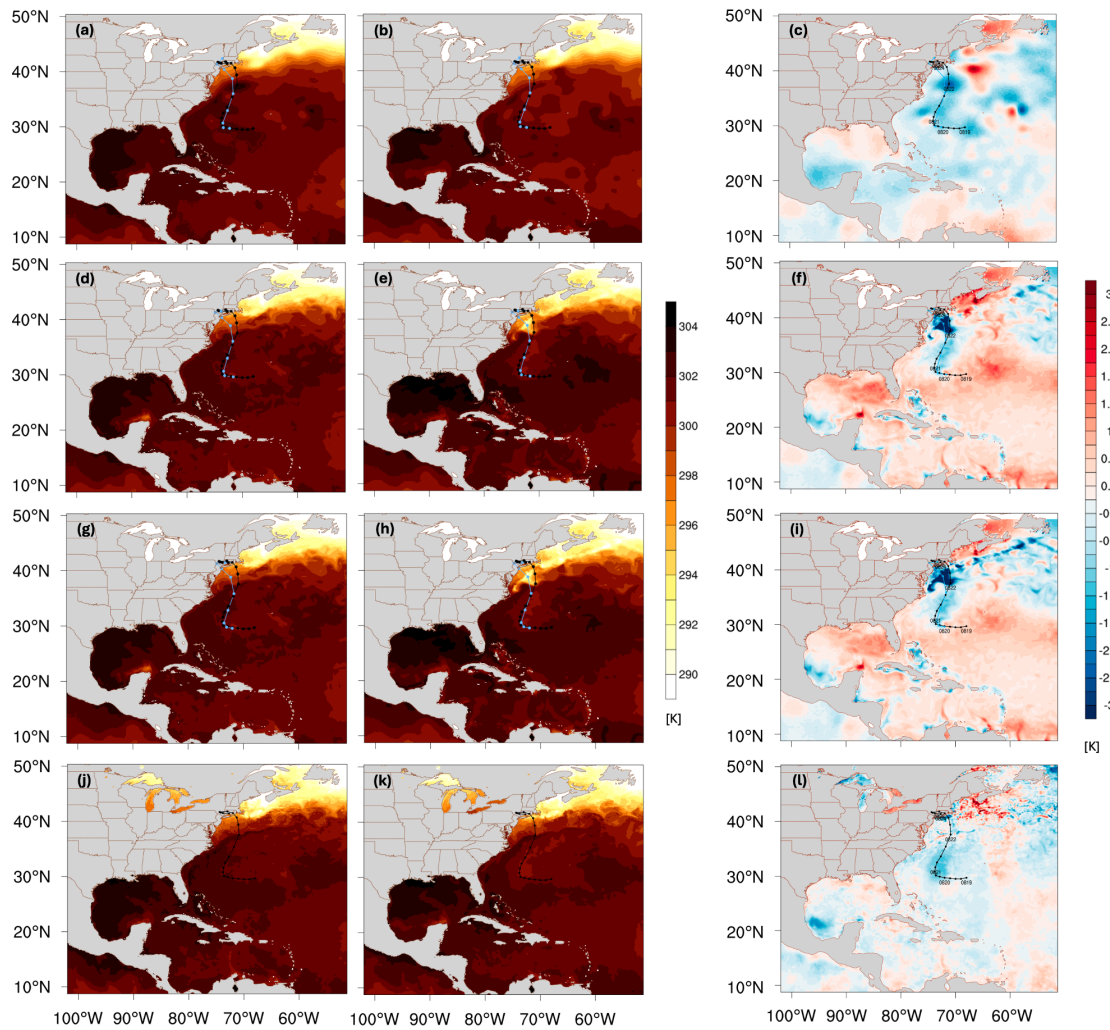

37

38 **Figure S3. SST comparisons for various experiments: ‘A’ (SST updated by GFS at 6-hour intervals, first row),**  
 39 **‘AO’ (atmosphere-ocean model coupling, second row), ‘AOW’ (atmosphere-ocean-wave model coupling,**  
 40 **third row), and OSTIA SST observation (fourth row). The first column shows SST at 12 UTC on 20<sup>th</sup> August**  
 41 **(pre-storm), the second column displays SST at 12 UTC 23<sup>rd</sup> August (post-storm), the third column presents**  
 42 **change in SST between pre-storm and post-storm. The black dots and lines indicate the best track derived**  
 43 **from IBTrACS. The light blue dots and lines depict simulated storm locations and tracks.**

44
